# Supplementary material
Source: Springer Nature journal article supplement (https://www.springermedizin.de/resource/supplementary/13075_2012_3603_MOESM11_ESM.pdf/9694898)

**A**

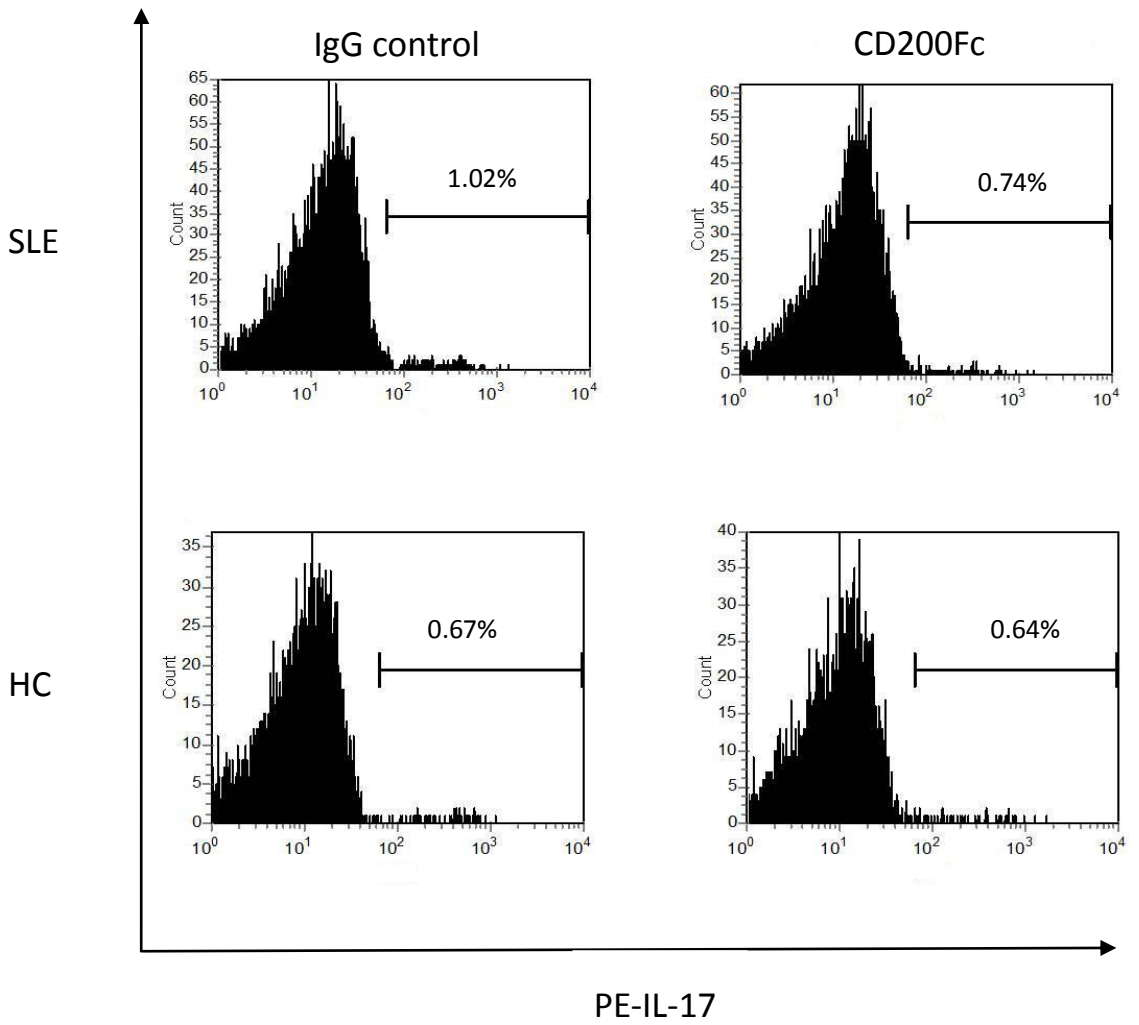

**B**

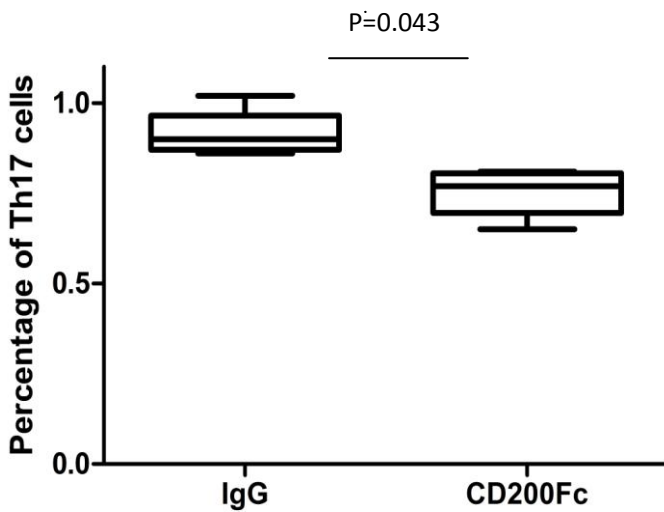

Supplement: MOESM11 [file 9694898]
